RESEARCH ARTICLE

# Molecular hydrogen protects against oxidative stress-induced SH-SY5Y neuroblastoma cell death through the process of mitohormesis

Yayoi Murakami<sup>1</sup>, Masafumi Ito<sup>2</sup>, Ikuroh Ohsawa<sup>1\*</sup>

**1** Biological Process of Aging, Tokyo Metropolitan Institute of Gerontology, Tokyo, Japan, **2** Research Team for Mechanism of Aging, Tokyo Metropolitan Institute of Gerontology, Tokyo, Japan

\* [ihsawa@tmig.or.jp](mailto:ihsawa@tmig.or.jp)

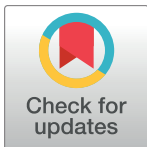

**OPEN ACCESS**

**Citation:** Murakami Y, Ito M, Ohsawa I (2017) Molecular hydrogen protects against oxidative stress-induced SH-SY5Y neuroblastoma cell death through the process of mitohormesis. PLoS ONE 12(5): e0176992. <https://doi.org/10.1371/journal.pone.0176992>

**Editor:** Ken Arai, Massachusetts General Hospital/Harvard Medical School, UNITED STATES

**Received:** November 11, 2016

**Accepted:** April 20, 2017

**Published:** May 3, 2017

**Copyright:** © 2017 Murakami et al. This is an open access article distributed under the terms of the [Creative Commons Attribution License](https://creativecommons.org/licenses/by/4.0/), which permits unrestricted use, distribution, and reproduction in any medium, provided the original author and source are credited.

**Data Availability Statement:** All relevant data are within the paper.

**Funding:** This work was supported in part by Japan Society for the Promotion of Science (JSPS) KAKENHI (<https://www.jsps.go.jp/english/e-grants/>) Grant Number 24500882 and 16H03267 for IO. The funder had no role in study design, data collection and analysis, decision to publish, or preparation of the manuscript.

**Competing interests:** The authors have declared that no competing interests exist.

## Abstract

Inhalation of molecular hydrogen (H<sub>2</sub>) gas ameliorates oxidative stress-induced acute injuries in the brain. Consumption of water nearly saturated with H<sub>2</sub> also prevents chronic neurodegenerative diseases including Parkinson's disease in animal and clinical studies. However, the molecular mechanisms underlying the remarkable effect of a small amount of H<sub>2</sub> remain unclear. Here, we investigated the effect of H<sub>2</sub> on mitochondria in cultured human neuroblastoma SH-SY5Y cells. H<sub>2</sub> increased the mitochondrial membrane potential and the cellular ATP level, which were accompanied by a decrease in the reduced glutathione level and an increase in the superoxide level. Pretreatment with H<sub>2</sub> suppressed H<sub>2</sub>O<sub>2</sub>-induced cell death, whereas post-treatment did not. Increases in the expression of anti-oxidative enzymes underlying the Nrf2 pathway in H<sub>2</sub>-treated cells indicated that mild stress caused by H<sub>2</sub> induced increased resistance to exacerbated oxidative stress. We propose that H<sub>2</sub> functions both as a radical scavenger and a mitohormetic effector against oxidative stress in cells.

## Introduction

Administration of molecular hydrogen (H<sub>2</sub>) has the potential to improve many diseases such as ischemic brain and heart infarctions, glaucoma, stress-induced cognitive decline, Parkinson's disease, metabolic syndrome, and inflammatory diseases [1–3]. As a weak reductant, H<sub>2</sub> rapidly diffuses into every tissue and cell and selectively scavenges highly toxic reactive oxygen species (ROS) including the hydroxyl radical (·OH) and peroxynitrite [4]. H<sub>2</sub> can be administered or taken into the body by numerous routes. These are roughly classified into three types: inhalation of H<sub>2</sub> gas, drinking of H<sub>2</sub>-dissolved water (HW), and injection of H<sub>2</sub>-dissolved saline. Administration of H<sub>2</sub> varies depending on the disease. However, when HW is orally administered, the amount of H<sub>2</sub> is too small to detoxify a huge amount of ROS in the diseased tissue. The molecular mechanisms underlying the remarkable effects of a small amount of H<sub>2</sub> remain unclear.

Several lines of evidence indicate that ·OH generated by ionizing irradiation of water reacts directly with H<sub>2</sub>. We also confirmed that the dissolved H<sub>2</sub> reduces ·OH produced by the Fenton reaction, ultraviolet irradiation, or sonication *in vitro*, as judged by the fluorescence of 3'-*p*-(hydroxyphenyl) fluorescein and the electron spin resonance spectrum of 5,5-dimethyl-1-pyrroline *N*-oxide [4–6]. The reduction of ·OH by H<sub>2</sub> was further observed in cultured cells, male germ cells in mouse, and retinas in rat [4, 7, 8]. These observations indicate that a sufficient amount of H<sub>2</sub> can efficiently moderate oxidative damage induced by ·OH. On the other hand, H<sub>2</sub> indirectly reduces oxidative stress by inducing anti-oxidation systems *in vivo*. Treatment with H<sub>2</sub> induces hemeoxygenase-1 (HO-1), superoxide dismutase (SOD), and catalase, and reduces cyclooxygenase-2 and endothelin-1 (ET-1) expression [9–12]. In Nrf2-deficient mice, the therapeutic effects of inhaling H<sub>2</sub> gas on hyperoxic lung injury decline with decreasing expression of HO-1 [13], indicating that activation of Nrf2 is involved in the biological pathways underlying the effects of H<sub>2</sub>.

In the current study, we investigated the effect of H<sub>2</sub> on mitochondria in cultured neuroblastoma SH-SY5Y cells and found that H<sub>2</sub> increased the mitochondrial membrane potential ( $\Delta\Psi_m$ ) and cellular ATP level, with an accompanying decrease in the reduced glutathione (GSH) level. Pretreatment of cells with H<sub>2</sub> suppressed H<sub>2</sub>O<sub>2</sub>-induced oxidative stress, whereas post-treatment did not. These results raise the possibility that H<sub>2</sub> functions differentially as an inducer of an adaptive response and as a radical scavenger in cells.

## Methods

### Cell culture and H<sub>2</sub> treatment

Human neuroblastoma SH-SY5Y cells (ATCC CRL-2266) were maintained in Dulbecco's modified eagle medium (DMEM) containing 10% fetal bovine serum (FBS), 25 mM HEPES, 1 mM pyruvate, penicillin-streptomycin, and 10 mM glucose (Glc) or galactose (Gal). Culture with Gal as the sole source of sugar forces mammalian cells to rely on mitochondrial oxidative phosphorylation (OXPHOS) [14].

H<sub>2</sub>-mixed gas was composed of 10% O<sub>2</sub>, 5% CO<sub>2</sub>, 35% N<sub>2</sub>, and 50% H<sub>2</sub> (purity > 99.999%; Iwatani, Tokyo, Japan). N<sub>2</sub>-mixed gas was composed of 10% O<sub>2</sub>, 5% CO<sub>2</sub>, and 85% N<sub>2</sub>. Cells grown on culture dishes ( $5 \times 10^4/\text{cm}^2$ ) for 1 day in a 5% CO<sub>2</sub> incubator were set in acrylamide boxes ( $6.8 \times 10^3/\text{cm}^3$ ), which were strewn with wet paper to prevent desiccation. The boxes were sealed and filled with an appropriate mixed gas at a flow rate of 1 L/min for 30 min under normal pressure (Fig 1A). After filling, cells in the boxes were incubated at 37°C for the indicated duration. Immediately after incubation, the H<sub>2</sub> and O<sub>2</sub> concentrations in the culture medium were monitored with specific electrodes (Unisense, Aarhus N, Denmark). Under H<sub>2</sub>-mixed gas, the H<sub>2</sub> concentration was maintained at  $390 \pm 40 \mu\text{M}$ . Under both H<sub>2</sub>- and N<sub>2</sub>-mixed gases, the O<sub>2</sub> concentration was maintained at  $120 \pm 10 \mu\text{M}$  (Fig 1B).

### Cell survival assay

Cells ( $5 \times 10^4/\text{cm}^2$ ) grown in a 24- or 96-well plate for 1 day were used. For pretreatment with mixed gases, cells were incubated in a box containing an appropriate mixed gas for the indicated duration. Immediately after exposure to the mixed gas, the culture medium was replaced with DMEM containing 1% FBS with/without H<sub>2</sub>O<sub>2</sub> and cells were further incubated in a conventional 5% CO<sub>2</sub> incubator for 18 h. For post-treatment with mixed gases, the culture medium was replaced with DMEM containing 1% FBS with/without H<sub>2</sub>O<sub>2</sub> and cells were further incubated in a box filled with an appropriate mixed gas for 18 h. After incubation, cell viability was estimated by a modified 3-(4,5-dimethylthiazol-2-yl)-2,5-diphenyl tetrasodium bromide viability assay according to the manufacturer's instructions (WST-1 assay,

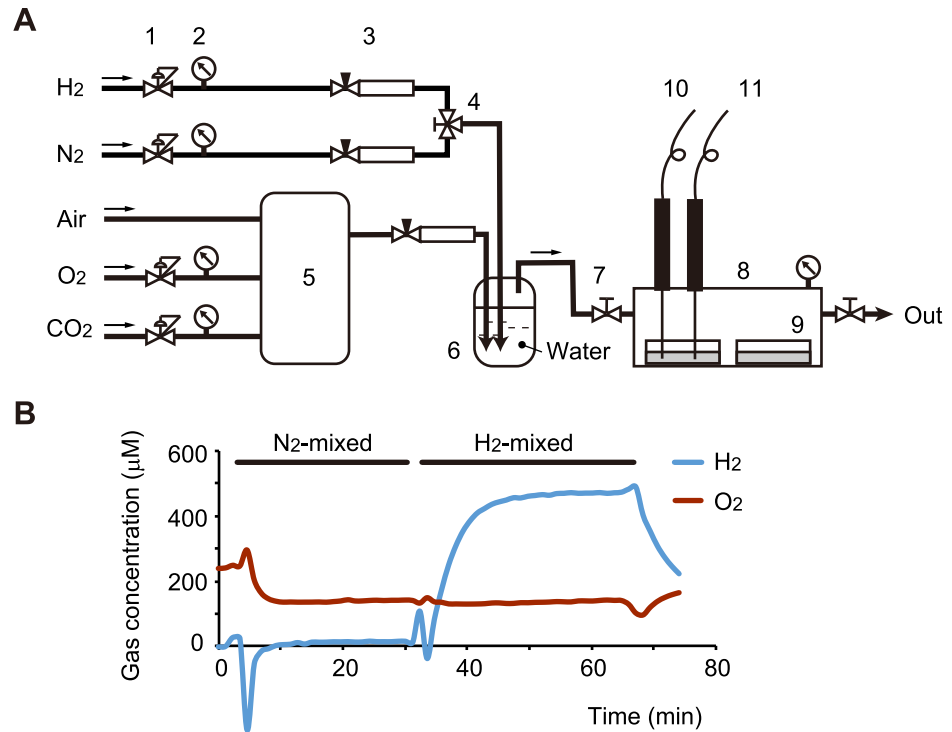

**Fig 1. Cell culture system under an atmosphere containing H<sub>2</sub> gas.** (A) Schematic representation of the culture system. 1. Pressure-reducing regulator. 2. Pressure gauge. 3. Flowmeter with flow control valve. 4. Three-way plug valve. 5. Multi-gas controller. 6. Bubbler bottle. 7. Gate valve. 8. Acrylamide box. 9. Culture dish. 10. H<sub>2</sub> electrode. 11. O<sub>2</sub> electrode. Note that, to avoid sudden ignition, H<sub>2</sub>- and O<sub>2</sub>-containing gases were mixed in a bubbler bottle with water. (B) H<sub>2</sub> and O<sub>2</sub> concentrations in culture medium were monitored with specific electrodes. Under H<sub>2</sub>-mixed gas, the H<sub>2</sub> concentration was maintained at 390±40 μM. Under both H<sub>2</sub>- and N<sub>2</sub>-mixed gases, the O<sub>2</sub> concentration was maintained at 120±10 μM.

<https://doi.org/10.1371/journal.pone.0176992.g001>

DOJINDO, Kumamoto, Japan) or a two-color fluorescence cell viability assay (LIVE/DEAD Viability/Cytotoxicity assay, Thermo Fisher, Waltham, MA, USA), which is based on the simultaneous determination of intracellular esterase activity and plasma membrane integrity.

### Evaluation of mitochondrial membrane potential

To monitor ( $\Delta\Psi_m$ ), JC-1 dye (Thermo Fisher) was used. After incubation in a box containing an appropriate mixed gas, cells in a 24-well plate were stained with 20 μM JC-1 for 10 min and then evaluated by confocal microscopy. Red aggregates and green monomers were recorded with excitation (Ex) at 535 nm/emission (Em) at 590 nm and Ex at 485 nm/Em at 535 nm, respectively. Relative ( $\Delta\Psi_m$ ) was analyzed using Image J software (Version 1.44, NIH, Bethesda, MD, USA). Data are shown as the arbitrary aggregate fluorescence units in three separate experiments.

### Oxygen consumption rate

The oxygen consumption rate in state 3 was determined at 37°C using high-resolution respirometry (Oroboros Oxygraph-2k, Innsbruck, Austria), essentially according to the protocol provided by the manufacturer. The resting respiration rate (state 2, the absence of adenylates) was measured following the transfer of  $5 \times 10^6$  cells to glass chambers in 2 ml of mitochondrial

respiration medium (0.5 mM EGTA, 3 mM MgCl<sub>2</sub>, 60 mM K-lactobionate, 20 mM taurine, 10 mM KH<sub>2</sub>PO<sub>4</sub>, 20 mM HEPES, 110 mM sucrose, and 1 g/l bovine serum albumin, pH 7.1). After measurement of endogenous respiration, 5 mM pyruvate, 10 mM glutamate, and 2 mM malate were added, and cells were permeabilized with 50 μg of digitonin. Complex I respiration was specifically assessed through the further addition of 1 mM ADP, followed by titration of 10 mM succinate as the complex II substrate to measure complex I and II respiration.

### ATP production

Cellular ATP in each 96-well culture plate was extracted and reacted with luciferin-luciferase according to the manufacturer's instructions (Cellular ATP Measurement System, TOYO INK, Tokyo, Japan). Bioluminescence was measured with a microplate luminometer (Envision, PerkinElmer, MA, USA).

### Cellular oxidative stress

To monitor the accumulation of mitochondrial thiol, after incubation in a box containing an appropriate mixed gas, cells in a 24-well plate were stained with 1 μM MitoTracker Red (MTR, Thermo Fisher) for 10 min, fixed with 4% paraformaldehyde, washed twice with phosphate-buffered saline, and then evaluated by confocal microscopy with Ex at 535 nm/Em at 590 nm. Cells were imaged and analyzed using Image J software. Data are shown as the arbitrary fluorescence units in three separate experiments.

Total glutathione and oxidized glutathione (GSSG) were measured using a luminescence-based system (GSH/GSSG-Glo Assay, Promega, Madison, WI, USA). Cells were washed with Hank's Balanced Salt Solution and lysed with lysis reagents. The GSH/GSSG ratio was calculated directly from luminescence measurements (in relative light units, RLU) using the following formula: GSH/GSSG ratio = (total glutathione RLU—GSSG RLU) / (GSSG RLU/2).

To monitor mitochondrial superoxide and cellular ROS, cells were incubated with 5 μM MitoSOX Red (Thermo Fisher) and 1 μM 5-(and-6)-chloromethyl-2',7'-dichlorodihydrofluorescein diacetate, acetyl ester (Thermo Fisher) prepared in Hank's Balanced Salt Solution for 10 min at 37°C, washed three times, and then scanned using a microplate fluorometer (Envision) with Ex at 510 nm/Em at 580 nm and Ex at 495 nm/Em at 520 nm, respectively.

### Cell staining

Immunocytochemistry was performed as previously described [15]. Cells were fixed with 4% paraformaldehyde prepared in phosphate-buffered saline, permeabilized with 0.2% Triton X-100, and incubated with an anti-Nrf-2 rabbit polyclonal antibody (C-20, Santa Cruz, Dallas, TX, USA). After incubation with a BODIPY FL-conjugated secondary antibody (anti-rabbit IgG; Thermo Fisher), cells were visualized by confocal laser microscopy.

### Measurement of mitochondrial DNA copy number

Total DNA was isolated from cells using proteinase K digestion followed by standard phenol/chloroform extraction and ethanol precipitation, and subjected to TaqMan probe-based quantitative PCR analysis using a real-time PCR system (StepOnePlus, Thermo Fisher). The primers and probes for MT-ND1 gene in the mitochondrial DNA (mtDNA) and 18S rRNA gene in the nuclear DNA (nDNA,) used are listed in Table 1. The mtDNA copy number was calculated as a ratio of mtDNA/nDNA.

**Table 1. Primers and probes used for semiquantitative PCR.**

| Gene     | Primer/probe sequences                                                                                                                  |
|----------|-----------------------------------------------------------------------------------------------------------------------------------------|
| MT-ND1   | Forward primer: CACCCAAGAACAGGGTTTGT<br>Reverse primer: TGGCCATGGGTATGTTGTTAA<br>Probe: 6FAM/TTACCGGGCTCTGCCATCT/TAMRA                  |
| 18S rRNA | Forward primer: TAGAGGGACAAGTGCGGTTTC<br>Reverse primer: CGCTGAGCCAGTCAGTGT<br>Probe: VIC/AGCAATAACAGGTCTGTGATG/TAMRA                   |
| ACTB     | Forward primer: CCTTCTACAATGAGCTGCGT<br>Reverse primer: TGGATAGCAACGTACATGGC<br>Probe: 56-FAM/ATCTGGGTC/ZEN/ATCTTCTCGGGTTG/3IABkFQ      |
| CAT      | Forward primer: GAGCACAGCATCCAATATTCTG<br>Reverse primer: TCCTCATTACAGCACGTTTAC<br>Probe: 56-FAM/TGCCCGCAC/ZEN/CTGAGTAACGTTATC/3IABkFQ  |
| GCLC     | Forward primer: CTCAGACATTGGATGGAGAGTAG<br>Reverse primer: GAGCAGTACCACAAACACCA<br>Probe: 56-FAM/TCGACCCAT/ZEN/GGAGGTGCAATTAACA/3IABkFQ |
| GPX1     | Forward primer: CTTCCCGTGCAACCAGTT<br>Reverse primer: TCTCGAAGAGCATGAAGTTGG<br>Probe: 56-FAM/TCGTTCTTG/ZEN/GCGTTCTCCTGATGC/3IABkFQ      |
| GSR      | Forward primer: CGATCTATOAGCACTTACCA<br>Reverse primer: GCATTTTCATCACACCCAAGTC<br>Probe: 56-FAM/CCAACCACC/ZEN/TTTCTTCCTTGTAGCAC/3IABkFQ |
| HMOX1    | Forward primer: AGGCAGAGGGTGATAGAAGAG<br>Reverse primer: CTCTGGTCCCTGGTGTCTAT<br>Probe: 56-FAM/AGAGCTGGA/ZEN/TGTTGAGCAGGAACG/31ABkFQ    |
| SOD2     | Forward primer: GCTTGGTTTCAATAAGGAACGG<br>Reverse primer: GCTCCACACATCAATCCC<br>Probe: 56-FAM/CCACTGCAA/ZEN/GGAACAACAGGCC/3IABkFQ       |

<https://doi.org/10.1371/journal.pone.0176992.t001>

## Semiquantitative PCR analysis of the mRNA levels of anti-oxidative enzymes

Cellular total RNA was extracted using an RNeasy Plus Mini kit (QIAGEN, Valencia, CA, USA) and subjected to reverse transcription with a first-strand synthesis system (SuperScript II, Thermo Fisher). Samples of the resulting cDNA were subjected to TaqMan probe-based quantitative PCR analysis using a real-time PCR system. The primers and probes used are listed in Table 1. Relative gene expression was calculated using the standard curve method. The mRNA levels were normalized to that of ACTB ( $\beta$ -actin) gene.

## Western blot analysis

Cells were homogenized in RIPA buffer and centrifuged (15,000 g at 4°C for 20 min), and the supernatants were collected and stored at -80°C. Denatured proteins (10  $\mu$ g in each lane) were separated on a 10% acrylamide gel and electrotransferred onto a polyvinylidene fluoride (PVDF) membrane. The PVDF membrane was blocked with skim milk and incubated at 4°C overnight with primary polyclonal rabbit antibodies against  $\gamma$ -glutamylcysteine synthetase heavy subunit ( $\gamma$ -GCS; 1:200, H-338, Santa Cruz), heme oxygenase-1 (HO-1; 1:500, ADI-SPA-896, Enzo Life Sci., Farmingdale, NY, USA), superoxide dismutase 2 (SOD2; 1:200, FL-222, Santa Cruz) and polyclonal goat antibodies against NAD(P)H quinone oxidoreductase 1 (NQO1; 1:200, C-19, Santa Cruz), Nrf2 (1:200, T-19, Santa Cruz). After washing, membranes were incubated with peroxidase-conjugated goat anti-rabbit IgG (1:10000, Jackson ImmunoResearch, West Grove, PA, USA) or rabbit anti-goat IgG (1:10000, Jackson ImmunoResearch)

at RT for 1 hour. Protein bands were detected using an enhanced chemiluminescence kit (ECL prime, GE Healthcare, Chicago, IL, USA) and visualized using an exposure and quantitation system (LAS-3000 mini, FUJI film, Tokyo, Japan). As a normalization control, the membranes were reprobbed for 3-phosphate dehydrogenase (GAPDH) and exposed to polyclonal rabbit antibody against GAPDH (1:1000, Cell Signaling, Danvers, MA, USA).

## Statistical analysis

All experiments were repeated two or three times with similar results ( $n = 4-5$  per group). Statistical analysis was performed by applying a one-way ANOVA with the Bonferroni correction or the Student's  $t$ -test. Data are presented as mean  $\pm$  SD. Results were considered significant at  $P < 0.05$ . A two-way ANOVA was used to evaluate effects of pretreatment with mixed gases for different durations on cell death; a significant interaction was interpreted by a subsequent simple-effects analysis with the Student's  $t$ -test.

## Results

### Protective effect of H<sub>2</sub> pretreatment against H<sub>2</sub>O<sub>2</sub>-induced cell death

To investigate the molecular mechanisms underlying the physiological function of H<sub>2</sub>, we used human neuroblastoma SH-SY5Y cells because several lines of evidence indicate that treatment with H<sub>2</sub> effectively protects against neuronal damage *in vivo* [3]. To prevent an accidental change in the O<sub>2</sub> concentration, which would strongly affect cellular signaling and cell fate, we established a new cell culture system under strict gas control and carefully monitored the concentrations of H<sub>2</sub> and O<sub>2</sub> in the medium (Fig 1). SH-SY5Y cells were cultured in medium containing either Glc or Gal. Substituting Gal for Glc in cell culture media enhances mitochondrial metabolism [16]. Pretreatment of cells with 50% H<sub>2</sub> gas for 18 h in both Glc- and Gal-containing media suppressed H<sub>2</sub>O<sub>2</sub>-induced cell death (Fig 2A), whereas post-treatment did not (Fig 2B). The protective effect of pretreatment was dose-dependent, and H<sub>2</sub> concentrations of 1% and higher were significantly effective (Fig 2C). Pretreatment with 50% H<sub>2</sub> for 3 h was sufficient to elicit the protective effect, whereas pretreatment for 1 h was not (Fig 2D). Cells were still protected against H<sub>2</sub>O<sub>2</sub> toxicity at 3 h after the end of pretreatment with 50% H<sub>2</sub>, whereas after 6 h they were not (Fig 2E), indicating that the protective effects of pretreatment are transient in growing cultured cells.

### Enhancement of mitochondrial activity by H<sub>2</sub> treatment

We previously observed that H<sub>2</sub> prevents the antimycin A (a mitochondrial respiratory complex III inhibitor)-dependent decline in  $\Delta\Psi_m$  [4]. We used the  $\Delta\Psi_m$  indicator JC-1 to determine the physiological changes of mitochondria in intact cells treated with 50% H<sub>2</sub> for 18 h. H<sub>2</sub> treatment significantly increased  $\Delta\Psi_m$  in both Glc- and Gal-containing media (Fig 3A). Furthermore, H<sub>2</sub> treatment increased the accumulation of cellular ATP (Fig 3B), indicating that it activates OXPHOS and then enhances mitochondrial energy production. To confirm the activation of mitochondrial OXPHOS, we measured cellular O<sub>2</sub> consumption by high-resolution respirometry. H<sub>2</sub> treatment enhanced the O<sub>2</sub> consumption rate in state 3 (Fig 3C). On the other hand, the mtDNA copy number relative to nuclear genes was not affected by H<sub>2</sub> treatment (Fig 3D), indicating that the increase in oxygen consumption per cell was not due to a change in the mitochondrial copy number.

### Induction of weak oxidative stress by H<sub>2</sub> treatment

To monitor the effects of mitochondrial hyperactivity induced by H<sub>2</sub> treatment on oxidative stress, we first used MTR. This dye contains a mildly thiol-reactive chloromethyl moiety,



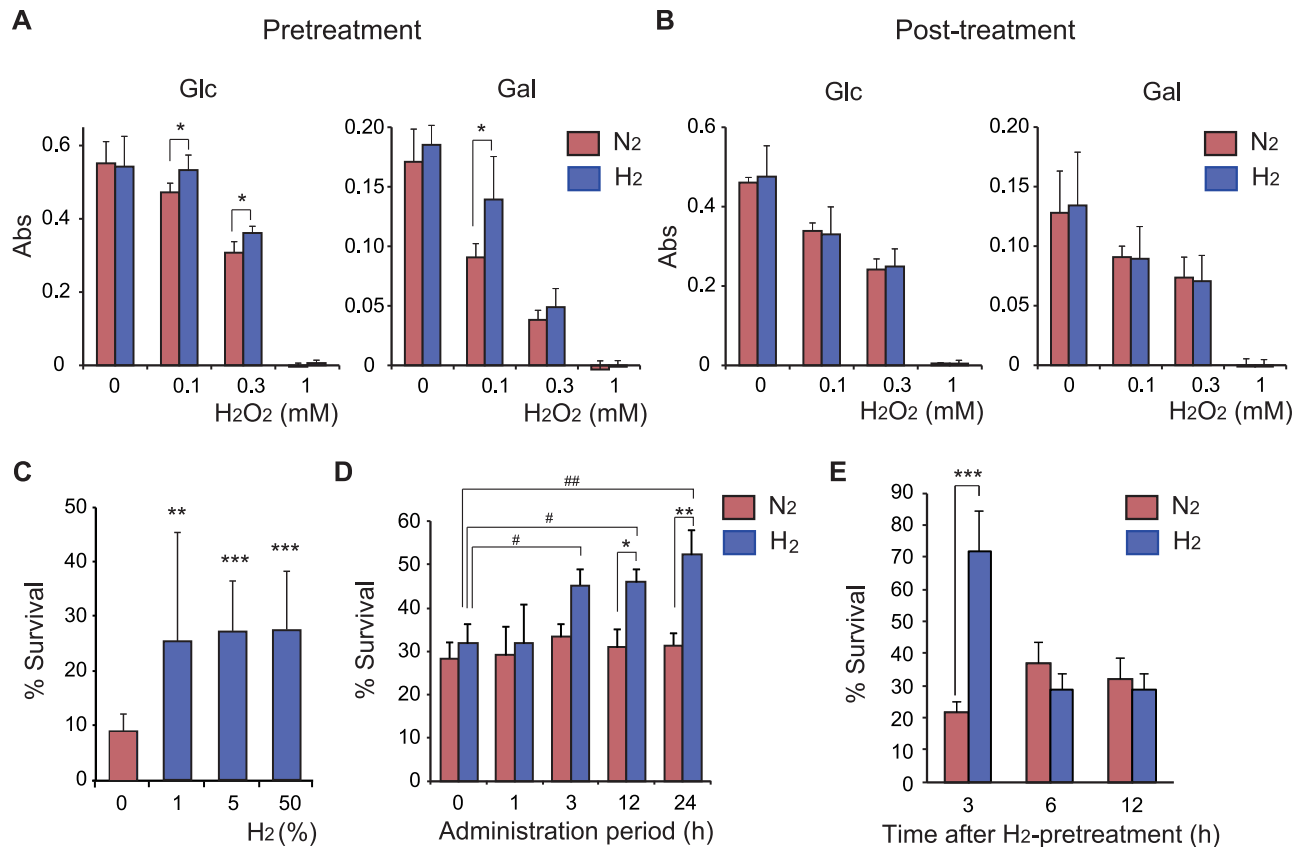

**Fig 2. Protective effect of H<sub>2</sub> pretreatment against H<sub>2</sub>O<sub>2</sub>-induced cell death.** (A) For pretreatment with mixed gas, SH-SY5Y cells were incubated in culture medium containing either Glc or Gal under N<sub>2</sub>- or H<sub>2</sub>-mixed gas for 18 h. Immediately after the end of exposure to the mixed gas, the medium was replaced with fresh medium containing the indicated concentration of H<sub>2</sub>O<sub>2</sub>. Cells were further incubated in a conventional CO<sub>2</sub> incubator for 18 h. (B) For post-treatment with mixed gases, culture medium containing either Glc or Gal was replaced with fresh medium containing the indicated concentration of H<sub>2</sub>O<sub>2</sub>. Cells were further incubated under an appropriate mixed gas. After the final incubation, cell viability was estimated by a modified 3-(4,5-dimethylthiazol-2-yl)-2,5-diphenyl tetrasodium bromide viability assay (A, B). (C) The protective effects of pretreatment with mixed gas containing different concentrations of H<sub>2</sub> against 0.5 mM H<sub>2</sub>O<sub>2</sub>-induced cell death were examined. (D) The protective effects of pretreatment with N<sub>2</sub>- or H<sub>2</sub>-mixed gas for different durations against 0.5 mM H<sub>2</sub>O<sub>2</sub>-induced cell death were examined. Applying two-way ANOVA showed significant effects of mixed gas ( $P = 0.0017$ ) and duration ( $P = 0.0315$ ), however no interaction between them was observed ( $P = 0.2224$ ). (E) After pretreatment with N<sub>2</sub>- or H<sub>2</sub>-mixed gas, culture medium was replaced with fresh medium, cells were incubated in a conventional CO<sub>2</sub> incubator for the indicated duration, and then H<sub>2</sub>O<sub>2</sub> (final 0.5mM) was added. Cells were further incubated for 18 h. All cells used in C—E were cultured in medium containing Glc. After the final incubation, cell viability was estimated by a two-color fluorescence cell viability assay and expressed as a percentage compared with cells not treated with H<sub>2</sub>O<sub>2</sub> (considered as 100%) (C—E). \* $P < 0.05$ , \*\* $P < 0.01$ , \*\*\* $P < 0.001$  versus treatment with N<sub>2</sub>-mixed gas. # $P < 0.05$ , ## $P < 0.01$  versus an administration period of 0 h.

<https://doi.org/10.1371/journal.pone.0176992.g002>

which keeps it associated with mitochondria after fixation [17]. H<sub>2</sub> treatment attenuated staining with MTR, indicating that it decreased the thiol concentration in mitochondria (Fig 4A and 4B). H<sub>2</sub> treatment decreased the total glutathione and GSH levels (Fig 4C and 4D), indicating that the decrease in the thiol concentration was at least partially dependent on that in GSH. H<sub>2</sub> treatment significantly increased superoxide formation in cells cultured in Gal-containing medium (Fig 4E), whereas it did not increase the formation of DCFDA-indicated ROS (Fig 4F). Both the decrease in GSH and the increase in superoxide strongly suggest that H<sub>2</sub> treatment induces oxidative stress in cells. However, H<sub>2</sub>-induced oxidative stress was too weak to affect cell survival (Fig 2A and 2B).

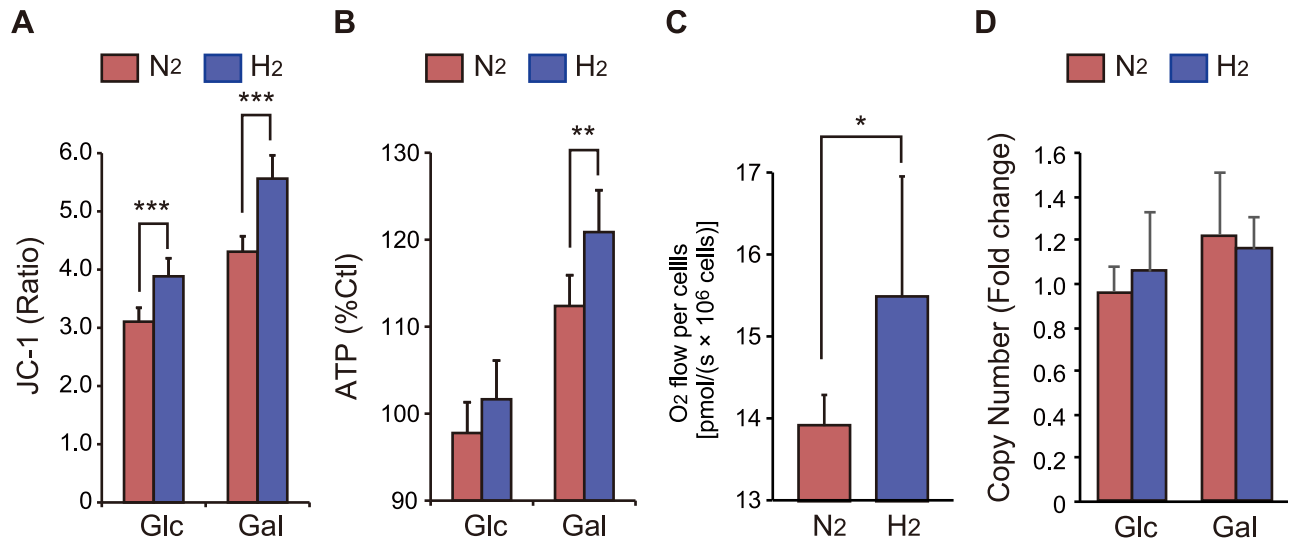

**Fig 3. Enhancement of mitochondrial activities by H<sub>2</sub> treatment.** (A) H<sub>2</sub> treatment enhanced JC-1-indicated  $\Delta\Psi_m$ , which was expressed as the ratio of monomers to aggregates. (B) H<sub>2</sub> treatment enhanced the accumulation of ATP, which was expressed as a percentage compared with cells not treated with mixed gases (considered as 100%). SH-SY5Y cells were incubated in culture medium containing either Glc or Gal under N<sub>2</sub>- or H<sub>2</sub>-mixed gas for 18 h.  $^{**}P < 0.01$ ,  $^{***}P < 0.001$  (A, B). (C) H<sub>2</sub> treatment enhanced the O<sub>2</sub> consumption rate in state 3. O<sub>2</sub> consumption was monitored with high-resolution respirometry.  $^{*}P < 0.05$ . (D) The mtDNA copy number relative to nDNA in cells incubated under H<sub>2</sub>-mixed gas was quantified by real-time PCR analysis, and expressed relative to those in cells incubated under N<sub>2</sub>-mixed gas.

<https://doi.org/10.1371/journal.pone.0176992.g003>

### Induction of the anti-oxidative defense system by H<sub>2</sub> treatment

Weak oxidative stress is expected to be associated with triggering of an adaptive response to stronger oxidative stress [18]. To investigate induction of the anti-oxidative system, we stained cells with an anti-Nrf2 antibody. H<sub>2</sub> treatment induced translocation of the transcription factor Nrf2 into the nucleus (Fig 5A). We further measured the expression of anti-oxidative enzymes underlying the Nrf2 pathway by performing quantitative PCR. After H<sub>2</sub> treatment, transcription of CAT, GPX1 and GSR genes increased significantly (Fig 5B). Western blot of cell extracts also revealed that H<sub>2</sub> treatment resulted in an increase in HO-1, NQO1 and Nrf2 expressions (Fig 5C), indicating that weak oxidative stress induced by H<sub>2</sub> treatment evokes an anti-oxidative defense system in SH-SY5Y cells.

### Discussion

Increasing evidence suggests that some natural products and synthetic drugs that improve our health may act via a characteristic process called hormesis, in which adaptive responses against cellular stress are activated [19, 20]. In the current study, we found that H<sub>2</sub> pretreatment effectively protects against H<sub>2</sub>O<sub>2</sub>-induced neuronal damage *in vitro*; H<sub>2</sub>-induced slight activation of mitochondria accompanied by weak oxidative stress triggers adaptive responses against oxidative stress.

H<sub>2</sub> selectively reduces the highly toxic ROS OH<sup>-</sup> and peroxynitrite, but not O<sub>2</sub><sup>-</sup>, H<sub>2</sub>O<sub>2</sub>, or nitric oxide [4]. The cellular toxicity of H<sub>2</sub>O<sub>2</sub> is partially explained by the production of ·OH, which leads to alterations of lipids, proteins, and nucleic acids [21]. We previously observed that H<sub>2</sub> reduces a large amount of ·OH produced by the Fenton reaction, irradiation, or sonication *in vitro* [4–6], strongly supporting the conclusion that a sufficient amount of H<sub>2</sub> can efficiently moderate cellular oxidative damage induced by ·OH. However, treatment with 50%



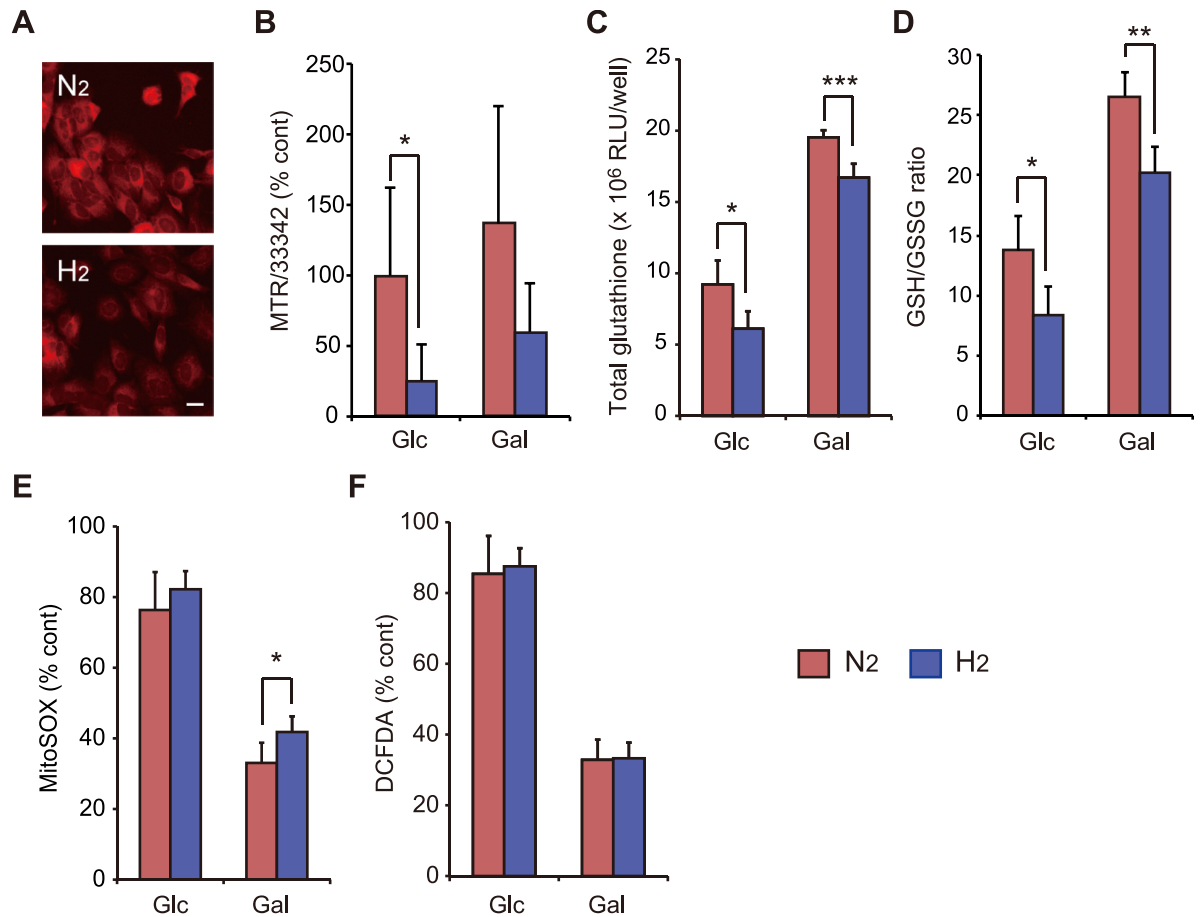

**Fig 4. Induction of oxidative stress by H<sub>2</sub> treatment.** SH-SY5Y cells were incubated in culture medium containing either Glc or Gal under N<sub>2</sub>- or H<sub>2</sub>-mixed gas for 18 h. (A, B) H<sub>2</sub> treatment attenuated staining with MTR, which was expressed as a percentage compared with cells not treated with mixed gases (considered as 100%). The scale bar is 20 μm in (A). (C, D) H<sub>2</sub> treatment decreased the total glutathione and GSH levels. (E) H<sub>2</sub> treatment increased superoxide formation in cells cultured in Gal-containing medium, which was expressed as a percentage compared with cells not treated with mixed gases (considered as 100%). (F) H<sub>2</sub> treatment did not increase DCFDA-indicated ROS, which was expressed as a percentage compared with cells not treated with mixed gases (considered as 100%). \**P* < 0.05, \*\**P* < 0.01, \*\*\**P* < 0.001.

<https://doi.org/10.1371/journal.pone.0176992.g004>

H<sub>2</sub> gas after the addition of H<sub>2</sub>O<sub>2</sub> (post-treatment) did not protect cells (Fig 2A and 2B). Because of the relatively low reactivity of H<sub>2</sub> against ·OH [22], we speculate that the steady-state concentration of ·OH derived from exogenous H<sub>2</sub>O<sub>2</sub> in the cell is too low to react with H<sub>2</sub>. On the other hand, pretreatment with H<sub>2</sub> ameliorated H<sub>2</sub>O<sub>2</sub>-induced cell death. When H<sub>2</sub>O<sub>2</sub> was added, no detectable amount of H<sub>2</sub> remained in the cell (data not shown), suggesting that the pretreatment dose of H<sub>2</sub> did not directly prevent H<sub>2</sub>O<sub>2</sub>-induced oxidative damage, but provoked an anti-oxidative defense system against H<sub>2</sub>O<sub>2</sub> in our experiments.

The protective effect of H<sub>2</sub> pretreatment was dose-dependent, and H<sub>2</sub> concentrations of 1% and higher were significantly effective (Fig 2C). Inhalation of H<sub>2</sub> gas is the simplest method to intake H<sub>2</sub> and ameliorates acute diseases such as ischemia-reperfusion and graft injuries of several organs [1, 2]. The effective concentration of H<sub>2</sub> in mixed gas is usually maintained between 1% and 4% [4, 23, 24]. On the other hand, drinking water saturated with H<sub>2</sub> (1.6 ppm, saturated with 100% H<sub>2</sub> gas) is safer and more convenient than inhaling H<sub>2</sub> gas. After administration of HW containing a saturating amount of H<sub>2</sub> (80%) with a feeding needle in mouse,

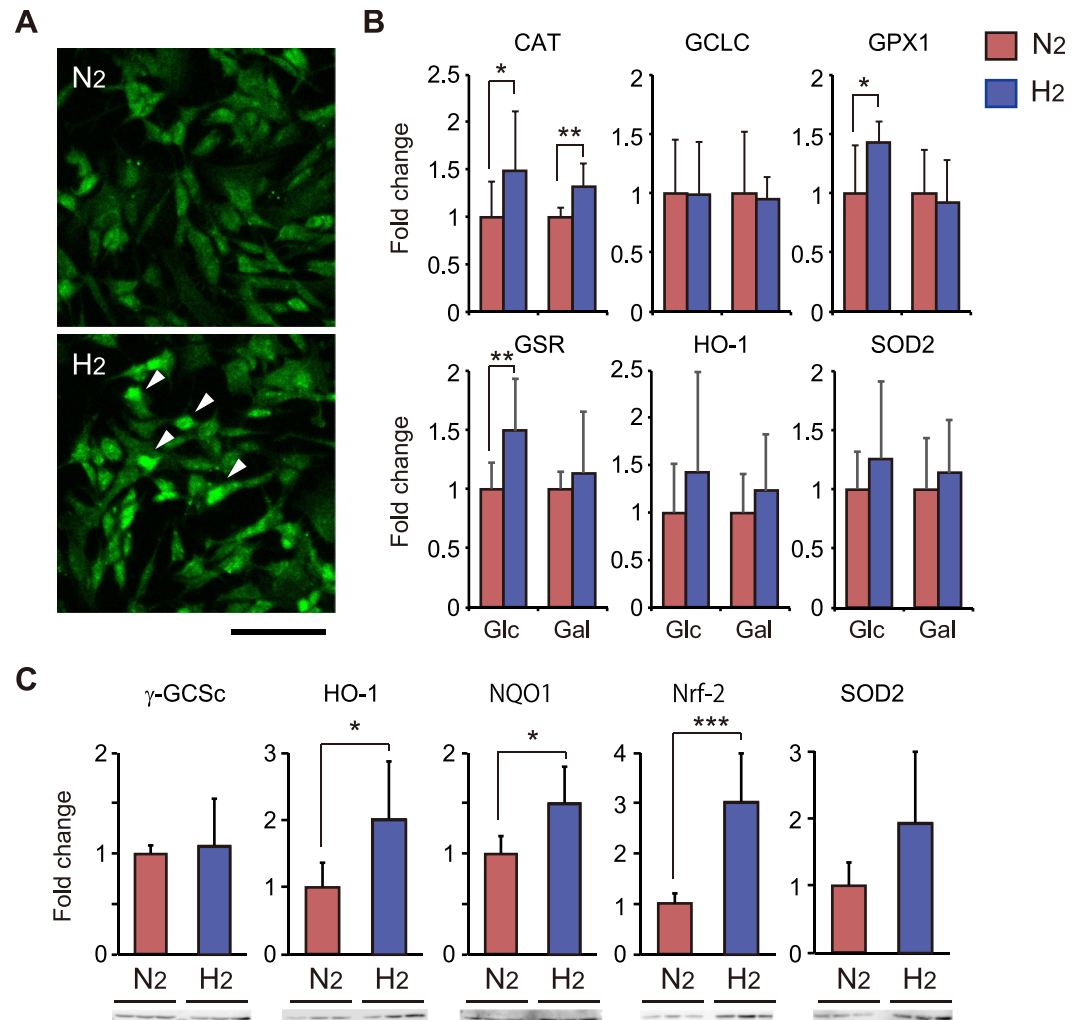

**Fig 5. The H<sub>2</sub>-induced anti-oxidative defense system.** (A) SH-SY5Y cells were stained with an anti-Nrf2 antibody. H<sub>2</sub> treatment induced translocation of Nrf2 into the nucleus (arrow heads). The scale bar is 100 μm. (B) Cells were incubated in culture medium containing either Glc or Gal under N<sub>2</sub>- or H<sub>2</sub>-mixed gas for 18 h. The transcript levels of genes involved in the anti-oxidative defense system, including CAT, GCLC, GPX1, GSR, HO-1 and SOD2, were quantified by real-time PCR analysis coupled with reverse transcription of total RNA, and expressed relative to those in cells incubated under N<sub>2</sub>-mixed gas. (C) The expression levels of proteins involved in the anti-oxidative defense system, including γ-GCSc, HO-1, NQO1, Nrf2 and SOD2, were quantified by the intensity of representative immunoblots (n = 5 or 6, each), and expressed relative to those in cells incubated under N<sub>2</sub>-mixed gas. \*P < 0.05, \*\*P < 0.01, \*\*\*P < 0.001.

<https://doi.org/10.1371/journal.pone.0176992.g005>

the H<sub>2</sub> concentration in the liver is immediately elevated, peaking at approximately 2% H<sub>2</sub> [25]. These observations indicate that about a few percent of H<sub>2</sub> is the physiologically active concentration *in vivo*.

H<sub>2</sub> treatment significantly increased ΔΨ<sub>m</sub> and the cellular ATP level, indicating that H<sub>2</sub> treatment enhances mitochondrial energy production via activation of OXPHOS (Fig 3). This was supported by the observation that H<sub>2</sub> treatment enhanced the O<sub>2</sub> consumption rate. OXPHOS is regulated through respiratory control, allosteric regulation, and post-translational modifications [26]. Calcium is the strongest signal for mitochondrial activation [27]. Although the direct target molecule of H<sub>2</sub> in physiological conditions remains to be identified, several

potential effectors of H<sub>2</sub> have been discussed, including cell signaling molecules and hormones that are responsible for preventing oxidative stress and inflammation. Recently, Iuchi *et al.* demonstrated that low concentrations (approximately 1%) of H<sub>2</sub> modulate Ca<sup>2+</sup> signal transduction [28], indicating that excessive calcium signaling enhances OXPHOS activity.

OXPHOS in a hyperactive state leads to hyperpolarization of  $\Delta\Psi_m$ , which causes the generation of excessive ROS [29]. H<sub>2</sub> treatment attenuated staining with MTR after fixation (Fig 4A). Because the chloromethyl moiety of MTR is thiol-reactive, we speculated that H<sub>2</sub> treatment decreases the thiol concentration in mitochondria. We then measured the intracellular concentration of GSH, which is the most abundant thiol inside the cell [30]. H<sub>2</sub> treatment decreased the total amount of glutathione, concomitant with a lower GSH/GSSG ratio (Fig 4C and 4D). Finally, treatment with the selective reductant H<sub>2</sub> enhanced the accumulation of the mitochondrial ROS O<sub>2</sub><sup>-</sup> (Fig 4E), indicating that H<sub>2</sub> induces weak oxidative stress.

Increasing evidence indicates that transient exposure to low levels of ROS can protect neurons against subsequent exposure to a lethal level of oxidative stress [18]. The Keap1/Nrf2/ARE pathway is one of the molecular mechanisms underlying this adaptive response. Indeed, H<sub>2</sub> treatment induced the translocation of Nrf2 into the nucleus and enhanced the transcription of CAT, GPX1 and GSR and the accumulation of HO-1, NQO1 and Nrf-2 (Fig 5). H<sub>2</sub> pretreatment for more than 3 h was required to protect cells (Fig 2D). We speculated that exposure for 1 h was too short to induce oxidative stress sufficient to provoke an anti-oxidative defense system via transcriptional regulation.

In our experimental condition, a high dose of H<sub>2</sub>O<sub>2</sub> was used to induce cell death, accompanied by a decrease in mitochondrial activity, which was not prevented by the post-treatment with H<sub>2</sub> (Fig 2B). On the other hand, the post-treatment with H<sub>2</sub> did not enhance H<sub>2</sub>O<sub>2</sub>-dependent cell death, indicating that H<sub>2</sub>-induced oxidative stress is negligible and very weaker than that induced by H<sub>2</sub>O<sub>2</sub> during cell death. It was recently found that a low dose of H<sub>2</sub>O<sub>2</sub> also plays a crucial role in the induction of hormesis [31], suggesting that the simultaneous treatment with H<sub>2</sub> and a low dose of H<sub>2</sub>O<sub>2</sub> may coordinately enhance a defense system against oxidative stress. Further studies will be required to elucidate the hormesis effect of H<sub>2</sub> under weak oxidative stress.

With or without post-treatment with 0.3 mM H<sub>2</sub>O<sub>2</sub> induce cell death. However, treatment with 50% H<sub>2</sub> gas after the addition of H<sub>2</sub>O<sub>2</sub> (post-treatment) did not protect cells (Fig 2A and 2B). Because of the relatively low reactivity of H<sub>2</sub> against ·OH [22], we speculate that the steady-state concentration of ·OH derived from exogenous H<sub>2</sub>O<sub>2</sub> in the cell is too low to react with H<sub>2</sub>.

After drinking of HW, hypoxia-reoxygenation-induced superoxide formation in a mouse brain slice is suppressed [32]. Noteworthy, there is no trace amount of H<sub>2</sub> in the slice, indicating that HW induces anti-oxidation systems in the brain. We also found that preadministration of HW to mice before lipopolysaccharide injection prolongs survival and reduces oxidative stress in the liver, with increased expression of HO-1 and decreased expression of ET-1 [33].

In summary, H<sub>2</sub> pretreatment prevented H<sub>2</sub>O<sub>2</sub>-induced cell death, enhanced mitochondrial activities, accompanied by an increased level of oxidative stress, and then induced expression of anti-oxidative enzymes. Based on H<sub>2</sub>-induced adaptive responses *in vitro* and *in vivo*, we now consider that H<sub>2</sub> functions as a so-called mitohormetic effector against oxidative stress.

## Acknowledgments

We thank Dr. Masashi Tanaka for his kind advice and Mr. Tetsuya Suzuki for technical support.

## Author Contributions

**Conceptualization:** IO MI.

**Data curation:** IO YM MI.

**Formal analysis:** IO YM.

**Funding acquisition:** IO.

**Investigation:** IO YM.

**Methodology:** IO YM.

**Project administration:** IO.

**Resources:** IO MI.

**Software:** IO YM.

**Supervision:** IO.

**Validation:** IO YM.

**Visualization:** IO YM.

**Writing – original draft:** IO YM.

**Writing – review & editing:** MI.

## References

1. Ichihara M, Sobue S, Ito M, Ito M, Hirayama M, Ohno K (2015) Beneficial biological effects and the underlying mechanisms of molecular hydrogen—comprehensive review of 321 original articles. *Med Gas Res* 19(5):12.
2. Ohta S (2015) Molecular hydrogen as a novel antioxidant: overview of the advantages of hydrogen for medical applications. *Methods Enzymol* 555:289–317. <https://doi.org/10.1016/bs.mie.2014.11.038> PMID: 25747486
3. Iketani M, Ohsawa I (2016) Molecular Hydrogen as a Neuroprotective Agent. *Curr Neuropharmacol* [Epub ahead of print]
4. Ohsawa I, Ishikawa M, Takahashi K, Watanabe M, Nishimaki K, Yamagata K, et al. (2007) Hydrogen acts as a therapeutic antioxidant by selectively reducing cytotoxic oxygen radicals. *Nat Med* 13(6): 688–694. <https://doi.org/10.1038/nm1577> PMID: 17486089
5. Terasaki Y, Ohsawa I, Terasaki M, Takahashi M, Kunugi S, Dedong K, et al. (2011) Hydrogen therapy attenuates irradiation-induced lung damage by reducing oxidative stress. *Am J Physiol Lung Cell Mol Physiol* 301(4):L415–426. <https://doi.org/10.1152/ajplung.00008.2011> PMID: 21764987
6. Igarashi T, Ohsawa I, Kobayashi M, Igarashi T, Suzuki H, Iketani M, et al. (2016) Hydrogen prevents corneal endothelial damage in phacoemulsification cataract surgery. *Sci Rep* 6:31190. <https://doi.org/10.1038/srep31190> PMID: 27498755
7. Chuai Y, Gao F, Li B, Zhao L, Qian L, Cao F, et al. (2012) Hydrogen-rich saline attenuates radiation-induced male germ cell loss in mice through reducing hydroxyl radicals. *Biochem J* 15; 442(1):49–56.
8. Oharazawa H, Igarashi T, Yokota T, Fujii H, Suzuki H, Machide M, et al. (2010) Protection of the retina by rapid diffusion of hydrogen: administration of hydrogen-loaded eye drops in retinal ischemia-reperfusion injury. *Invest Ophthalmol Vis Sci* 51(1):487–92. <https://doi.org/10.1167/iovs.09-4089> PMID: 19834032
9. Kawamura T, Huang CS, Peng X, Masutani K, Shigemura N, Billiar TR, et al. (2011) The effect of donor treatment with hydrogen on lung allograft function in rats. *Surgery* 150(2):240–249. <https://doi.org/10.1016/j.surg.2011.05.019> PMID: 21801961
10. Li J, Dong Y, Chen H, Han H, Yu Y, Wang G, et al. (2012) Protective effects of hydrogen-rich saline in a rat model of permanent focal cerebral ischemia via reducing oxidative stress and inflammatory cytokines. *Brain Res* 1486:103–111. <https://doi.org/10.1016/j.brainres.2012.09.031> PMID: 23010312

11. Hugyecz M, Mracskó E, Hertelendy P, Farkas E, Domoki F, Bari F (2011) Hydrogen supplemented air inhalation reduces changes of prooxidant enzyme and gap junction protein levels after transient global cerebral ischemia in the rat hippocampus. *Brain Res* 1404:31–38. <https://doi.org/10.1016/j.brainres.2011.05.068> PMID: 21718970
12. Shimada S, Wakayama K, Fukai M, Shimamura T, Ishikawa T, Fukumori D, et al. (2016) Hydrogen Gas Ameliorates Hepatic Reperfusion Injury After Prolonged Cold Preservation in Isolated Perfused Rat Liver. *Artif Organs* [Epub ahead of print]
13. Kawamura T, Wakabayashi N, Shigemura N, Huang CS, Masutani K, Tanaka Y, et al. (2013) Hydrogen gas reduces hyperoxic lung injury via the Nrf2 pathway in vivo. *Am J Physiol Lung Cell Mol Physiol* 304(10):L646–656. <https://doi.org/10.1152/ajplung.00164.2012> PMID: 23475767
14. Robinson BH, Petrova-Benedict R, Buncic JR, Wallace DC (1992) Nonviability of cells with oxidative defects in galactose medium: a screening test for affected patient fibroblasts. *Biochem Med Metab Biol* 48(2):122–126. PMID: 1329873
15. Ohsawa I, Takamura C, Morimoto T, Ishiguro M, Kohsaka S (1999) Amino-terminal region of secreted form of amyloid precursor protein stimulates proliferation of neural stem cells. *Eur J Neurosci* 11(6):1907–1913. PMID: 10336659
16. Aguer C, Gambarotta D, Mailloux RJ, Moffat C, Dent R, McPherson R, et al. (2011) Galactose enhances oxidative metabolism and reveals mitochondrial dysfunction in human primary muscle cells. *PLoS One* 6(12):e28536. <https://doi.org/10.1371/journal.pone.0028536> PMID: 22194845
17. Chazotte B (2011) Labeling mitochondria with MitoTracker dyes. *Cold Spring Harb Protoc* 2011(8):990–992. <https://doi.org/10.1101/pdb.prot5648> PMID: 21807856
18. Texel SJ, Mattson MP (2010) Impaired adaptive cellular responses to oxidative stress and the pathogenesis of Alzheimer's disease. *Antioxid Redox Signal* 14(8):1519–1534.
19. Schieber M, Chandel NS (2014) ROS function in redox signaling and oxidative stress. *Curr Biol* 24(10):R453–462. <https://doi.org/10.1016/j.cub.2014.03.034> PMID: 24845678
20. Ristow M, Zarse K (2010) How increased oxidative stress promotes longevity and metabolic health: The concept of mitochondrial hormesis (mitohormesis). *Exp Gerontol* 45(6):410–418. <https://doi.org/10.1016/j.exger.2010.03.014> PMID: 20350594
21. Halliwell B (1987) Oxidants and human disease: some new concepts. *FASEB J* 1(5):358–364. PMID: 2824268
22. Ohno K, Ito M, Ichihara M, Ito M (2012) Molecular hydrogen as an emerging therapeutic medical gas for neurodegenerative and other diseases. *Oxid Med Cell Longev* 2012:353152. <https://doi.org/10.1155/2012/353152> PMID: 22720117
23. Yonamine R, Satoh Y, Kodama M, Araki Y, Kazama T (2013) Coadministration of hydrogen gas as part of the carrier gas mixture suppresses neuronal apoptosis and subsequent behavioral deficits caused by neonatal exposure to sevoflurane in mice. *Anesthesiology* 118(1):105–113. <https://doi.org/10.1097/ALN.0b013e318275146d> PMID: 23221861
24. Hayashida K, Sano M, Kamimura N, Yokota T, Suzuki M, Ohta S, et al. (2014) Hydrogen inhalation during normoxic resuscitation improves neurological outcome in a rat model of cardiac arrest independently of targeted temperature management. *Circulation* 130(24):2173–2180. <https://doi.org/10.1161/CIRCULATIONAHA.114.011848> PMID: 25366995
25. Kamimura N, Nishimaki K, Ohsawa I, Ohta S (2011) Molecular hydrogen improves obesity and diabetes by inducing hepatic FGF21 and stimulating energy metabolism in db/db mice. *Obesity (Silver Spring)* 19(7):1396–1403.
26. Hüttemann M, Helling S, Sanderson TH, Sinkler C, Samavati L, Mahapatra G, et al. (2012) Regulation of mitochondrial respiration and apoptosis through cell signaling: cytochrome c oxidase and cytochrome c in ischemia/reperfusion injury and inflammation. *Biochim Biophys Acta* 1817(4):598–609. <https://doi.org/10.1016/j.bbabi.2011.07.001> PMID: 21771582
27. Patergnani S, Suski JM, Agnoletto C, Bononi A, Bonora M, De Marchi E, et al. (2011) Calcium signaling around Mitochondria Associated Membranes (MAMs). *Cell Commun Signal* 9:19. <https://doi.org/10.1186/1478-811X-9-19> PMID: 21939514
28. Iuchi K, Imoto A, Kamimura N, Nishimaki K, Ichimiya H, Yokota T, et al. (2016) Molecular hydrogen regulates gene expression by modifying the free radical chain reaction-dependent generation of oxidized phospholipid mediators. *Sci Rep* 6:18971. <https://doi.org/10.1038/srep18971> PMID: 26739257
29. Seppet E, Gruno M, Peetsalu A, Gizatullina Z, Nguyen HP, Vielhaber S, et al. (2009) Mitochondria and energetic depression in cell pathophysiology. *Int J Mol Sci* 10(5):2252–2303. <https://doi.org/10.3390/ijms10052252> PMID: 19564950
30. Circu ML, Aw TY (2008) Glutathione and apoptosis. *Free Radic Res* 42(8):689–706. <https://doi.org/10.1080/10715760802317663> PMID: 18671159

31. Ludovico P, Burhans WC (2014) Reactive oxygen species, ageing and the hormesis police. *FEMS Yeast Res* 14(1):33–39. <https://doi.org/10.1111/1567-1364.12070> PMID: 23965186
32. Sato Y, Kajiyama S, Amano A, Kondo Y, Sasaki T, Handa S, et al. (2008) Hydrogen-rich pure water prevents superoxide formation in brain slices of vitamin C-depleted SMP30/GNL knockout mice. *Biochem Biophys Res Commun* 375(3):346–350. <https://doi.org/10.1016/j.bbrc.2008.08.020> PMID: 18706888
33. Iketani M, Ohshiro J, Urushibara T, Takahashi M, Arai T, Kawaguchi H, et al. (2016) Preadministration of hydrogen-rich water protects against lipopolysaccharide-induced sepsis and attenuates liver injury. *Shock* [Epub ahead of print]
